# Supplementary material
Source: Springer Nature journal article supplement (https://www.springermedizin.de/resource/supplementary/13075_2009_2761_MOESM3_ESM.pdf/9692826)

**A**

mPGES-1 promoter construct

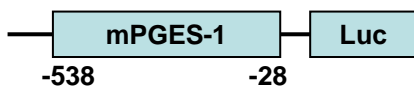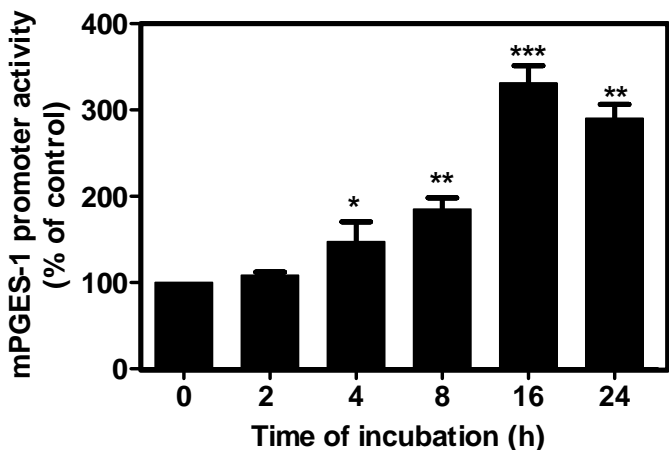**B**

3 x Egr-1 binding sites

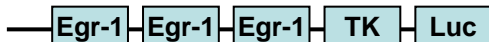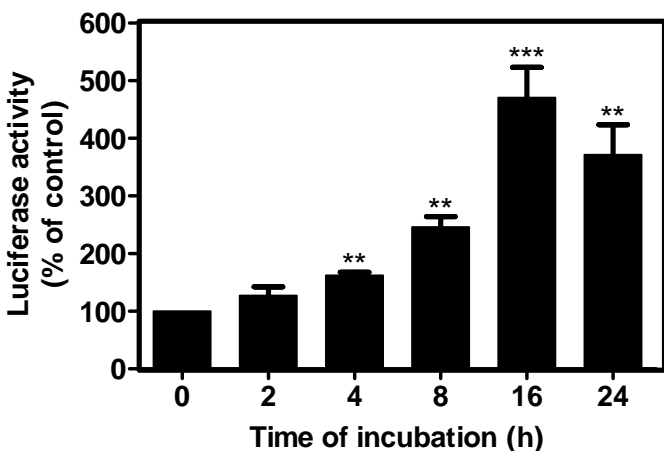**C**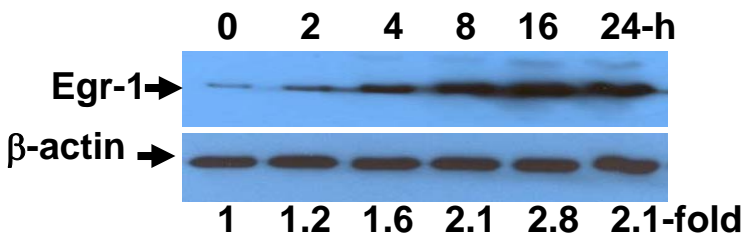

Supplement: MOESM3 [file 9692826]
